# Supplementary material for: Spatial effects of air pollution on the economic burden of disease: implications of health and environment crisis in a post-COVID-19 world
Source: Springer Nature journal article supplement (doi:10.1186/s12939-022-01774-6), 2022-11-15

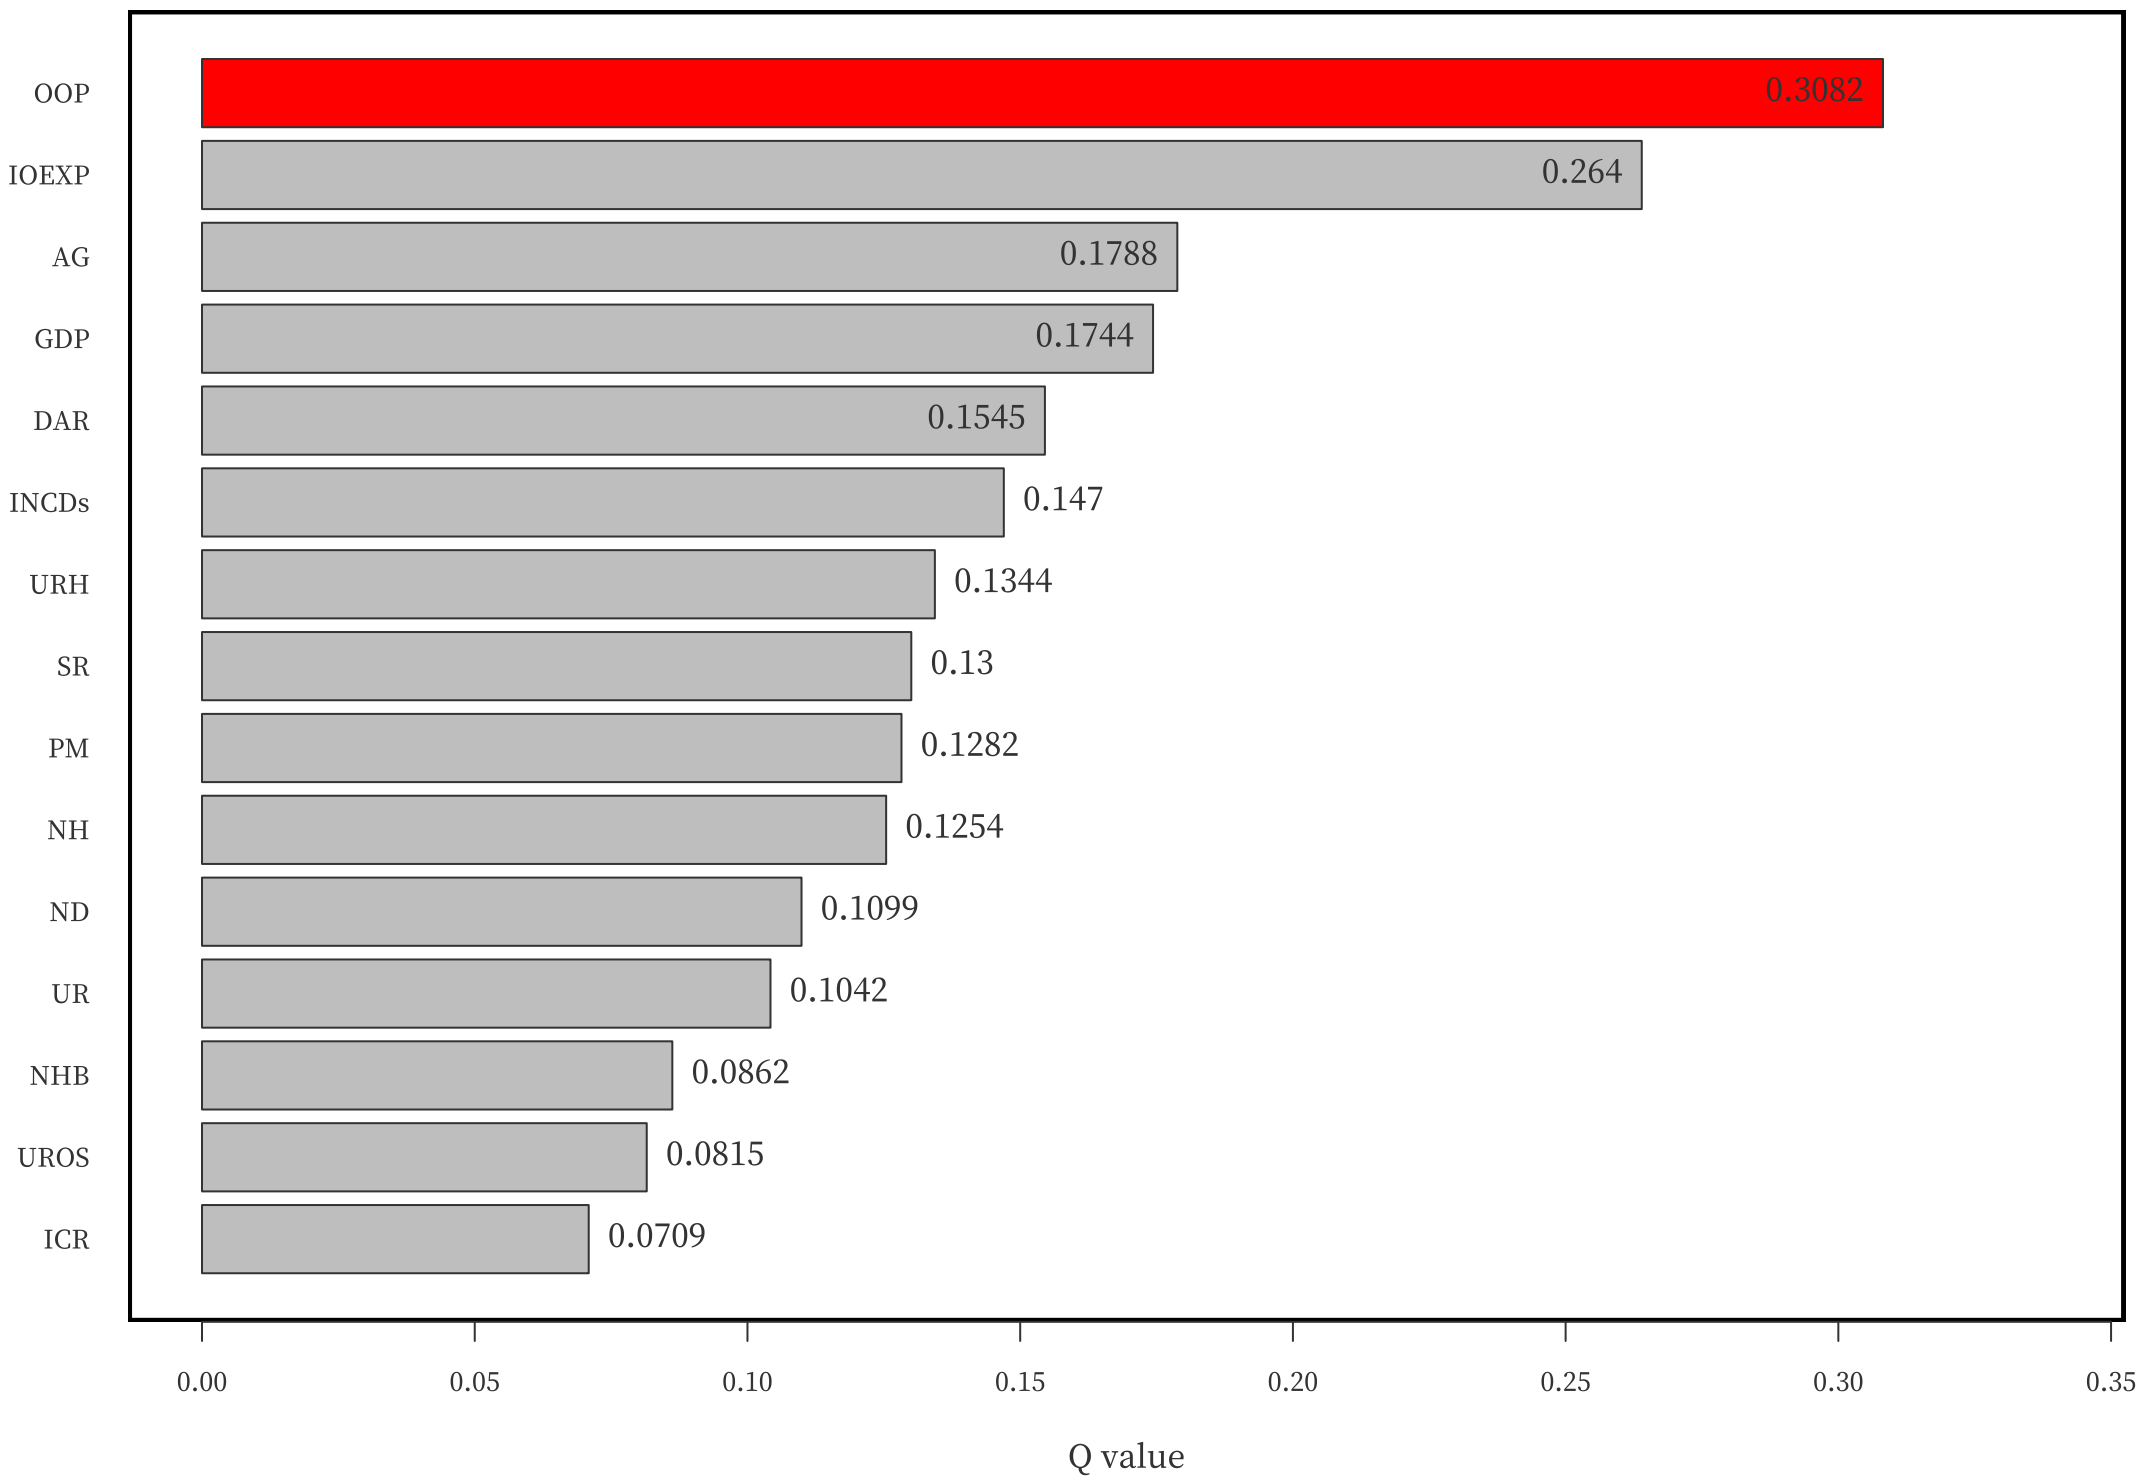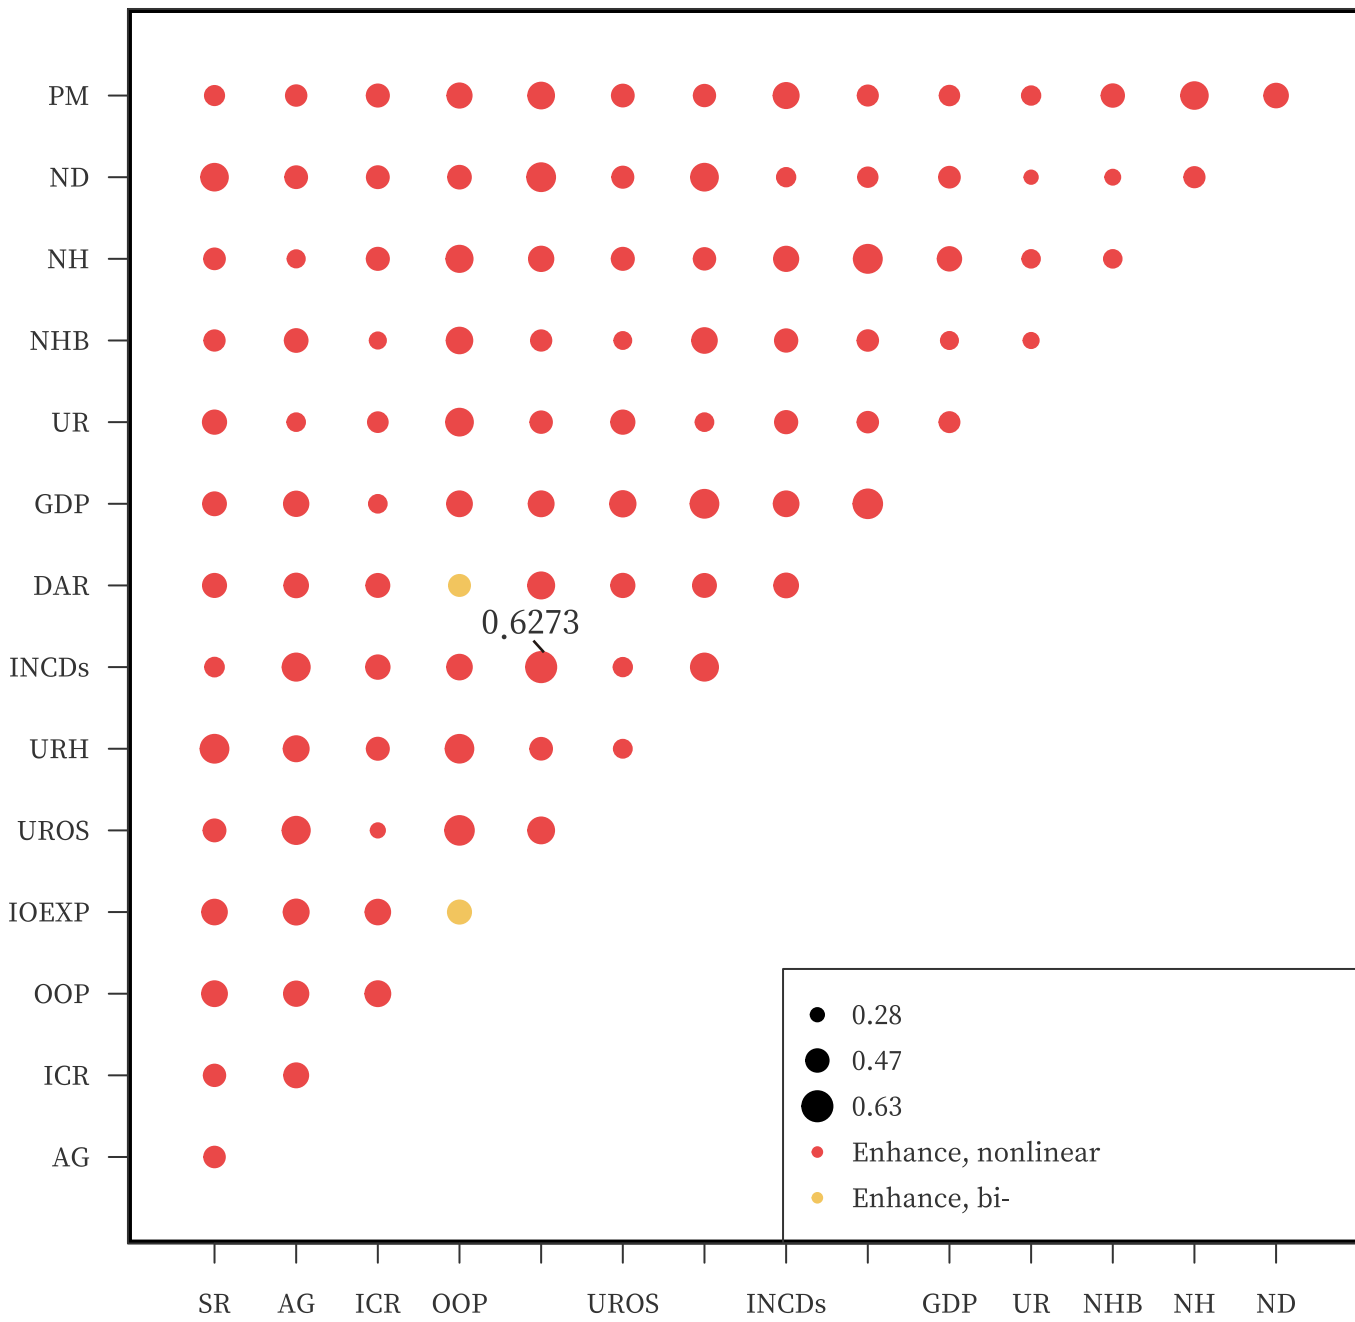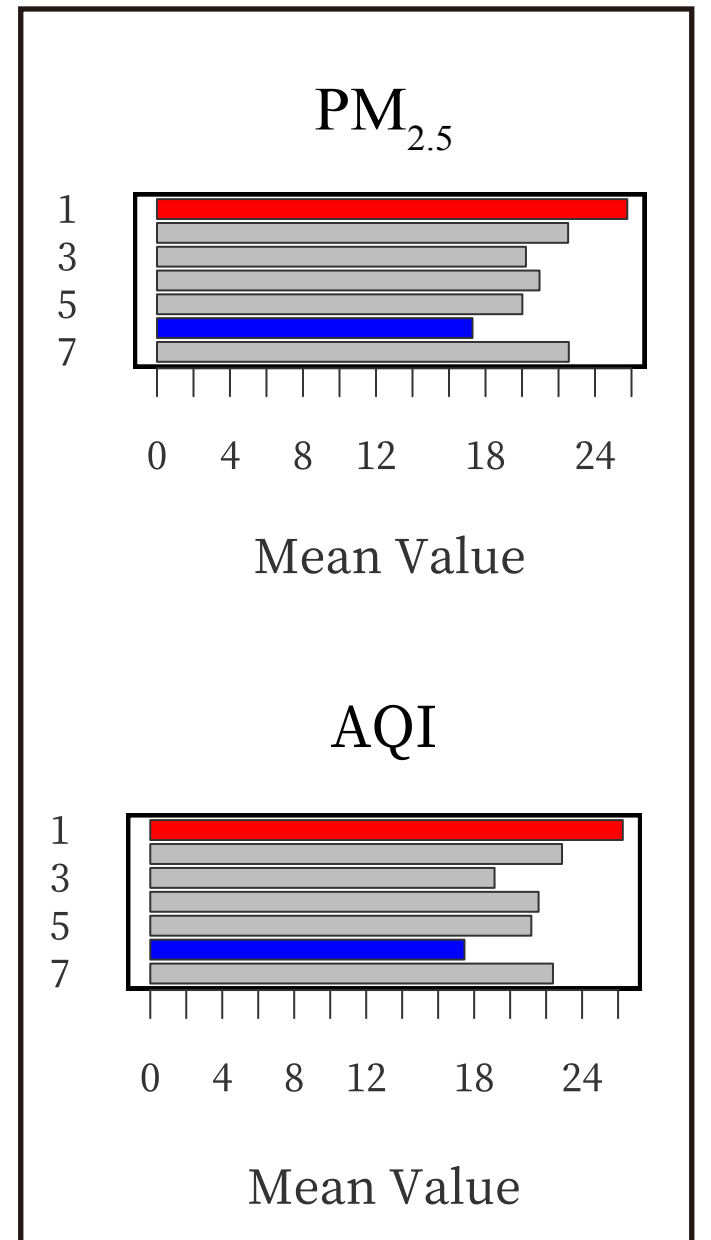

Supplement: MOESM1 [file 23714730]
